# Supplementary material for: Therapeutic targeting of the PLK1-PRC1-axis triggers cell death in genomically silent childhood cancer
Source: PubMed Central journal article supplement (PMC8445938; doi:10.1038/s41467-021-25553-z), 2021-09-16
Supplement: 41467_2021_25553_MOESM1_ESM.pdf [file 41467_2021_25553_MOESM1_ESM.pdf]

Supplementary Figure 1 Li *et al.*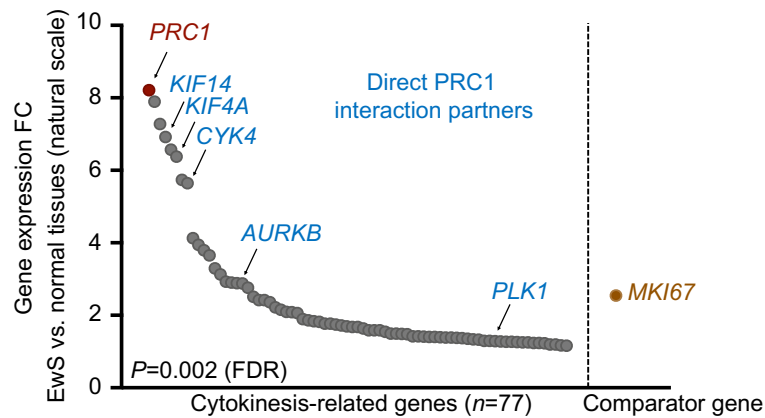**Supplementary Fig. 1 | *PRC1* is the top overexpressed cytokinesis-related gene in EwS**

Displayed are 77 significantly upregulated genes in EwS compared to normal tissues (linear fold change (FC) $>1$ , FDR  $P<0.05$ ) that are annotated for the GO-term cytokinesis (GO:0000910). *MKI67* encoding the proliferation marker Ki-67 was used as a comparator. *PRC1* and its direct interacting/binding partners, such as cytokinesis defect 4 (*CYK4*), aurora kinase B (*AURKB*), the kinesin family members 14 and 4A (*KIF14/4A*) and *PLK1*, have been indicated by arrows. FDR (false discover rate) multiple test.

## Supplementary Figure 2 Li et al.

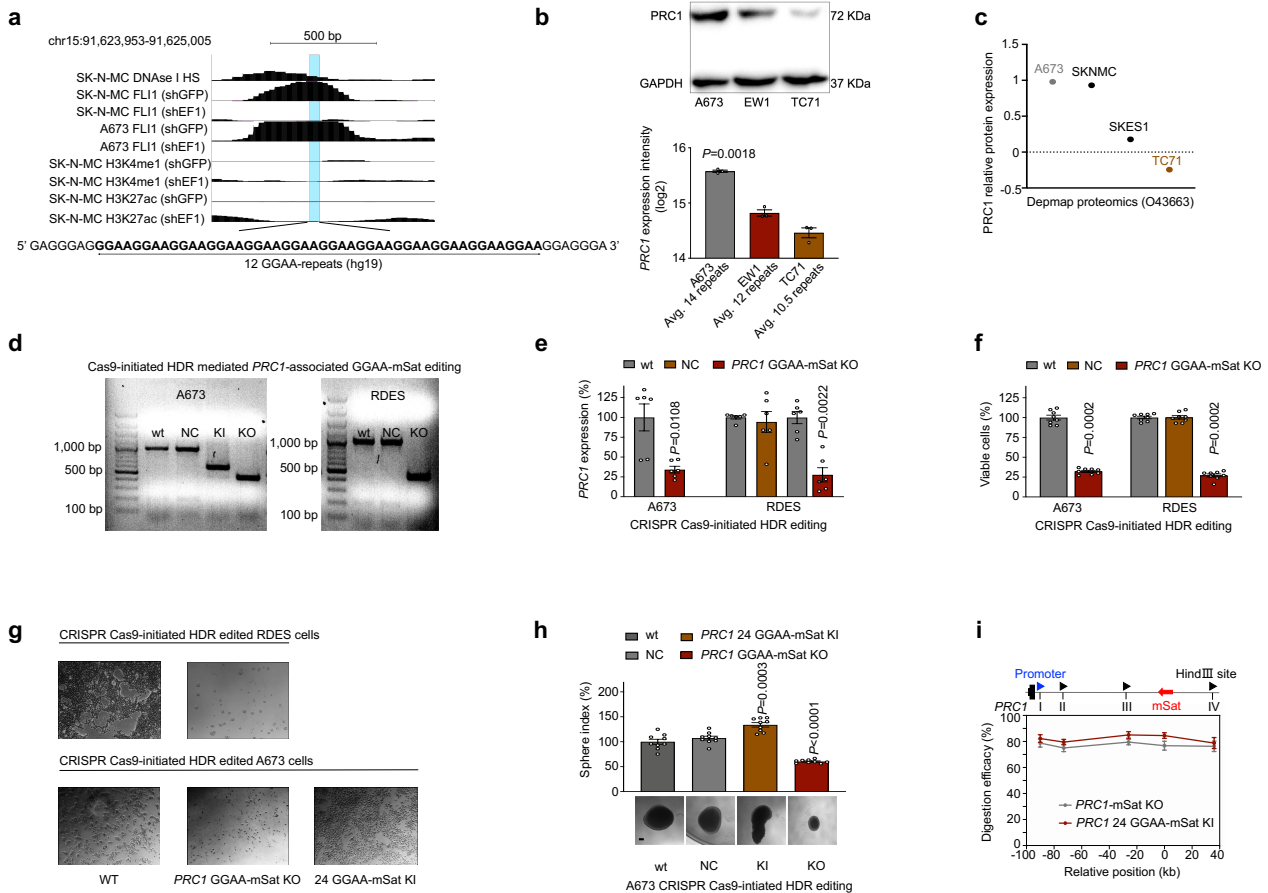

### Supplementary Fig. 2 | Physical interaction of the *PRC1*-associated GGAA-mSat with EWSR1-FLI1 regulates *PRC1* expression and induces morphological changes

a) Integrative genomic view (hg19) of the cloned fragment within the *PRC1* locus from EwS cells expressing shRNAs targeting either *GFP* (shGFP; control) or *EWSR1-FLI1* (shEF1); blue = *PRC1*-associated GGAA-mSat. b) Upper: Representative western blot of indicated EwS cell lines. GAPDH = loading control. Lower: Corresponding *PRC1* expression intensity (Affymetrix Clariom D microarrays, triplicates per cell line). The average number of GGAA-repeats at the *PRC1*-associated GGAA-mSat is reported. Horizontal bars represent means and whiskers SEM. One-way ANOVA test. c) Analysis of relative *PRC1* expression from the DepMap proteomics (O43663) dataset comprising 4 EwS cell lines. EwS cell lines A673 and TC71 corresponding to c) are indicated in gray or brown color, respectively. Data censoring: 25<sup>th</sup> May 2021. d) Representative images (from 3 independent experiments) of agarose gelelectrophoresis of amplicons containing the wildtype (wt) *PRC1*-associated GGAA-mSat, CRISPR Cas9-edited negative control (NC), or CRISPR Cas9-initiated HDR edited KO of A673 and RDES cells, and the insertion of 24-GGAA-repeats in A673 cells. e) Analysis of *PRC1* expression by qRT-PCR in A673 and RDES wt cells, CRISPR Cas9-initiated HDR edited NC, and *PRC1*-associated GGAA-mSat KO cells. Data are displayed as individual dots. Horizontal bars represent means and whiskers SEM,  $n=6$  biologically independent experiments; Two-sided Mann-Whitney test. f) Proliferation analysis of A673 and RDES wt, CRISPR Cas9-initiated HDR edited NC and *PRC1*-associated GGAA-mSat KO cells 72h after seeding. Data are displayed as individual dots. Horizontal bars represent means and whiskers SEM,  $n=8$  biologically independent experiments; two-sided Mann-Whitney test. g) Representative cell culture images of A673 and RDES wt cells and their CIRPSR Cas9-initiated HDR derivatives (magnification: 40 $\times$ ). h) Sphere formation of A673 wt and their CRISPR/Cas9-initiated HDR edited *PRC1*-associated GGAA-mSat derivatives. Data are displayed as individual dots. Horizontal bars represent means and whiskers SEM,  $n=9$

biologically independent experiments; two-sided Mann-Whitney test. Representative images of spheres are shown; scale bar=50  $\mu\text{m}$ . i) Digestion efficiency for the HindIII digested fragments analyzed in the 3C-PCR assays measured by qRT-PCR. Dots represent means and whiskers SEM,  $n=4$  biologically independent experiments.

Supplementary Figure 3 Li et al.

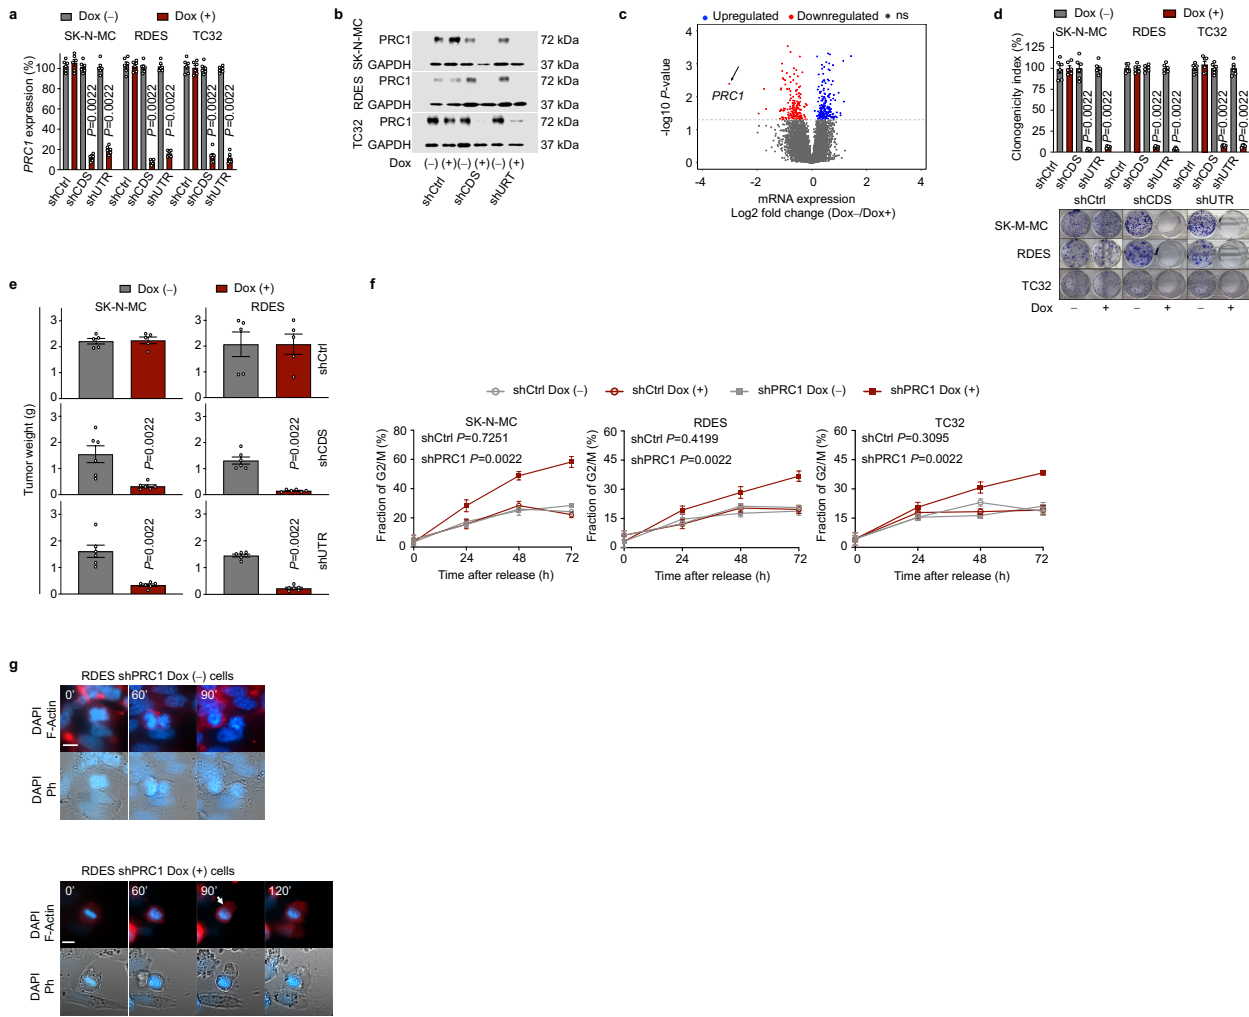

**Supplementary Fig. 3 | PRC1 promotes Ews proliferation and growth**

a) Analysis of *PRC1* mRNA levels by qRT-PCR in three Ews cell lines harboring Dox-inducible shPRC1 (shCDS/shUTR) or shCtrl constructs. Data are displayed as individual dots. Horizontal bars represent means and whiskers SEM,  $n=6$  biologically independent experiments. b) Representative images of Western blots of cells depicted in (a). GAPDH served as loading control. c) Volcano-plot depicting differentially expressed genes of RDES and SK-N-MC cells with/without *PRC1* knockdown (summary level data). Arrow indicates *PRC1*. d) Colony-forming assays of Ews cells with Dox-inducible *PRC1* knockdown or a non-targeting shCtrl. Data are displayed as individual dots. Horizontal bars represent means and whiskers SEM,  $n=6$  biologically independent experiments. e) Tumor weight (g) of xenografts from SK-N-MC and RDES cells containing two Dox-inducible shPRC1 constructs (shCDS/shUTR) or a non-targeting shCtrl. Data are displayed as individual dots. Horizontal bars represent means and whiskers SEM,  $n$  indicates the number of animals per condition:  $n=5$  for shCtrl in both cell lines,  $n=6$  for shCDS and shUTR in both cell lines. f) Analysis of G2/M cell cycle distribution after knockdown of *PRC1* in synchronized Ews cells harboring Dox-inducible shPRC1 or shCtrl constructs at 0h, 24h, 48h and 72h after releasing from G1/S blockage. Dots represent means and whiskers SEM,  $n=4$  biologically independent experiments.  $P$ -values were calculated by comparing G2/M cell cycle distributions at 72h post-release. g) Time frames (in min) from time-lapse microscopy showing RDES Ews cells with/without *PRC1* knockdown exhibiting mitotic activity without/with subsequent cytokinesis related to Fig. 3h. Arrow indicates ectopic furrow formation in *PRC1* knockdown cells. Cells were stained with Cy5™/Deep Red-F-Actin (red) and counterstained with Hoechst DNA dye (blue). Arrows indicate non-evenly segregated chromosome or merged single nuclei. Scale bar=10  $\mu$ m. Two-sided Mann-Whitney test in all panels.

Supplementary Figure 4 Li et al.

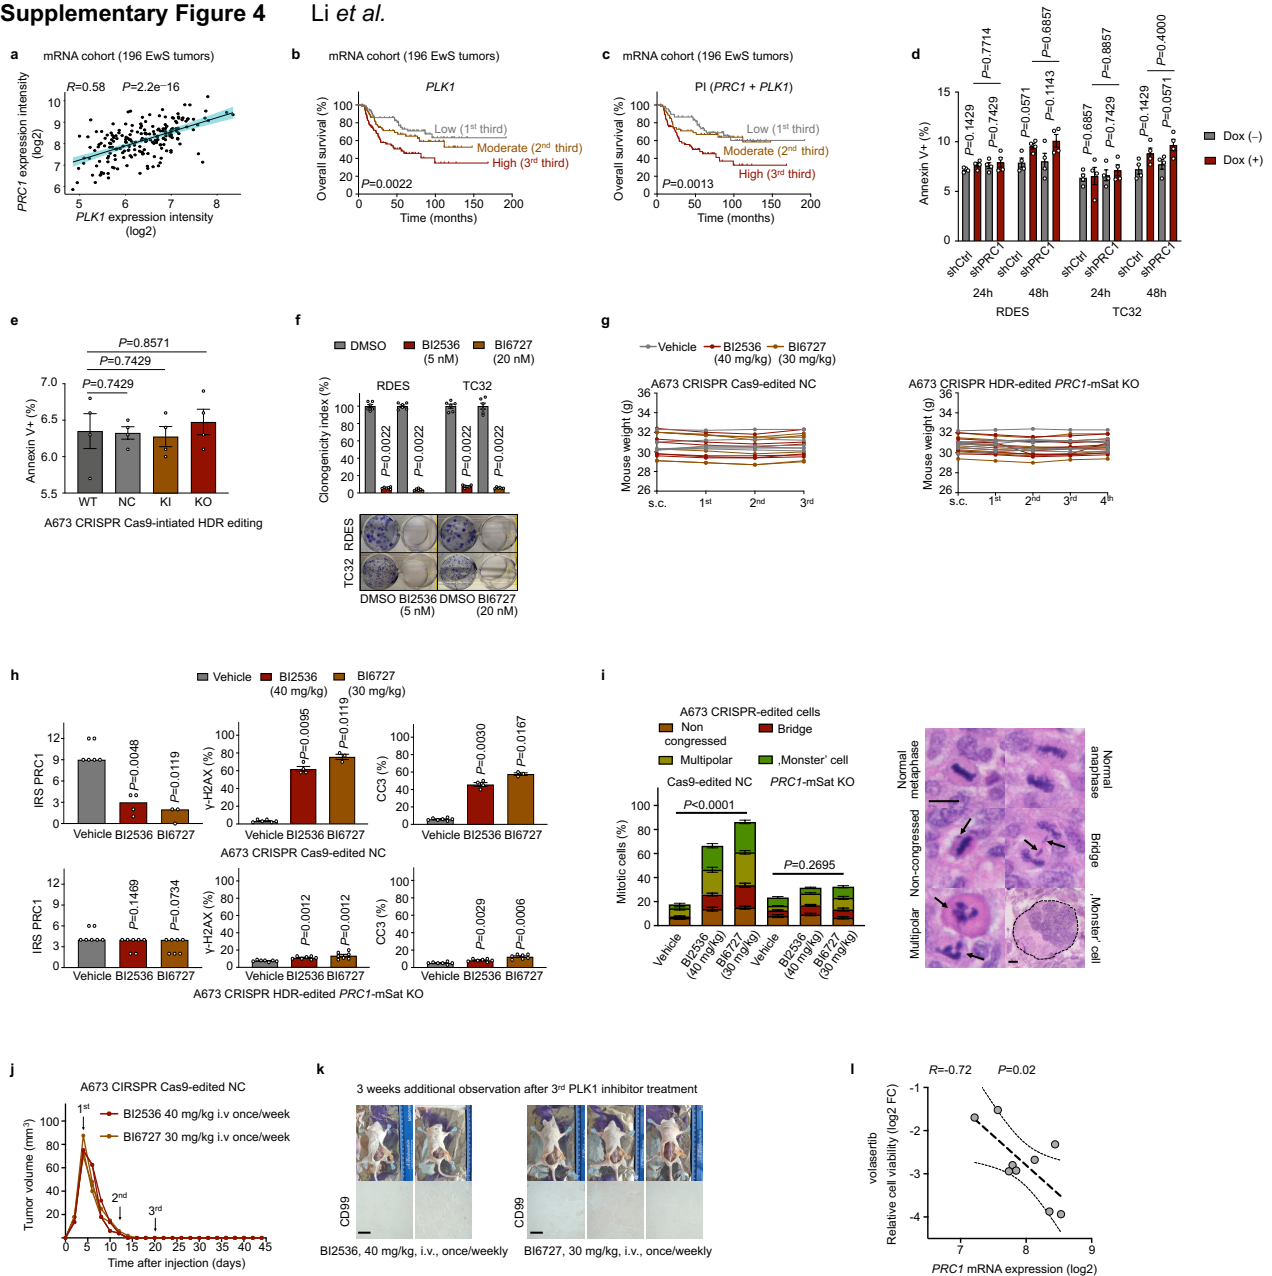

**Supplementary Fig. 4 | EwS is sensitive to PLK1 inhibitor treatment**

a) Correlation of *PLK1* and *PRC1* expression in EwS tumors. Two-sided test. b) Kaplan-Meier analysis of EwS patients stratified by thirds of *PLK1* expression. Two-sided Mantel-Haenszel test. c) Kaplan-Meier analysis of EwS patients stratified by thirds of combined prognostic index. Two-sided Mantel-Haenszel test. d) Analysis of apoptosis in EwS cells harboring Dox-inducible sh*PRC1* or shCtrl at 24h and 48h after *PRC1* knockdown. Dots represent means and whiskers SEM,  $n=4$  biologically independent experiments. Two-sided Mann-Whitney test. e) Analysis of apoptosis in wt and CRISPR Cas9-initiated HDR edited A673 cells 24h after seeding. Dots represent means and whiskers SEM,  $n=4$  biologically independent experiments. Two-sided Mann-Whitney test. f) Colony-forming of EwS cells treated with BI2536 or BI6727. Data are displayed as individual dots. Horizontal bars represent means and whiskers SEM,  $n=6$  biologically independent experiments; Two-sided Mann-Whitney test. g) Mice body weight during treatment. Dots represent individual mice,  $n=6$  animals per condition for NC-cells,  $n=7$  animals per condition for KO-cells. h) Quantification of IRS of *PRC1* and positivity of  $\gamma$ -H2AX and cleaved caspase-3 (CC3) of xenografts (Fig. 4f). Data are displayed as individual dots. Horizontal bars represent median IRS of *PRC1* or means and whiskers

SEM for positivity, respectively; *n* indicates the number of animals per condition: NC-cells, *n*=6 vehicle, *n*=4 BI2536, *n*=3 BI6727; *n*=7 for all conditions in KO-cells; Two-sided Mann-Whitney test. i) Representative micrographs of xenografts stained with H&E (Fig. 4f) and quantification of mitotic defects (min. 30 evaluated mitoses per tumor). Horizontal bars represent means and whiskers SEM, the number of independent animals per condition is as in (h); two-sided Chi-squared test; scale bar=10  $\mu$ m. j) Volume of xenografts during PLK1 inhibition and 25d of follow-up. k) Upper: Images of necropsy on xenografts showing complete tumor regression. Lower: Immunohistological assessment of the injection site stained with the EwS-marker CD99. Scale bar=100  $\mu$ m. l) Correlation analysis of *PRCI* mRNA expression level with relative cell viability upon PLK1 inhibitor BI6727 (Volasertib) treatment in 9 *EWSR1-FLII* positive EwS cell lines derived from DepMap project (data censoring: 25<sup>th</sup> May 2021). One-sided test.

## Supplementary Figure 5 Li et al.

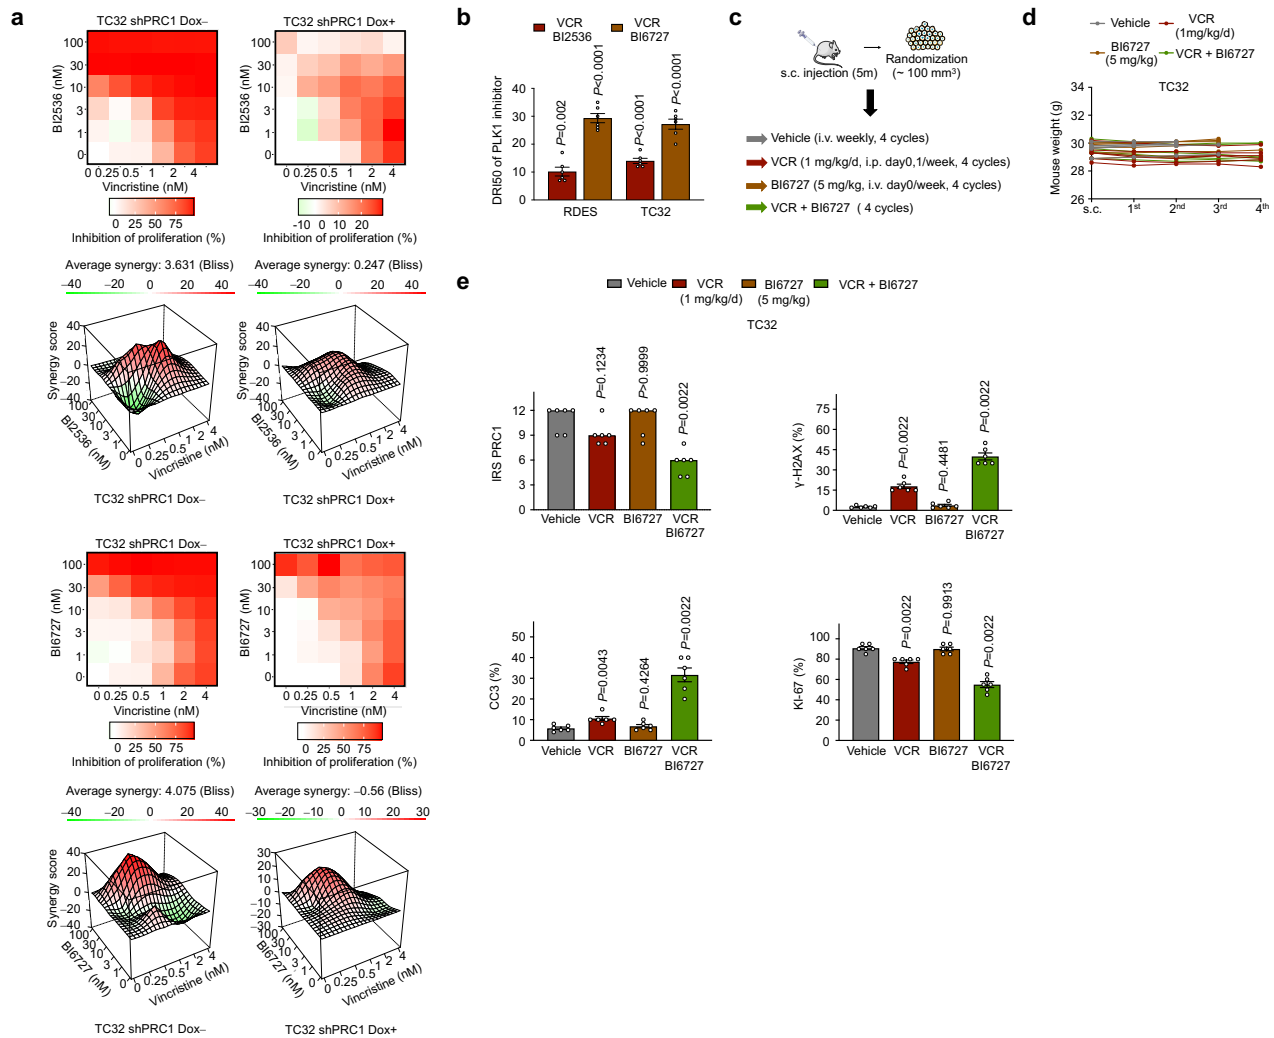**Supplementary Fig. 5 | Combining PLK1 inhibitors with vincristine in EwS cells**

a) Excess over Bliss analysis of TC32 EwS cells with/without shRNA-mediated *PRC1* knockdown treated with combinations of vincristine (VCR) and the PLK1 inhibitors BI2536 or BI6727 (red color indicates synergy) *in vitro*. Summary level data (means) from  $n=6$  biologically independent experiments are shown. b) Dose reduction index (DRI) of PLK1 inhibitor BI2536 or BI6727 at IC<sub>50</sub> level when combined with VCR in RDES and TC32 EwS cells. Data are displayed as individual dots. Horizontal bars represent means and whiskers SEM,  $n=6$  biologically independent experiments. c) Scheme of the experimental setting of VCR and PLK1 inhibitor combination treatment (BI6727) *in vivo*. NSG mice were xenografted with TC32 EwS cells. When tumors were palpable, mice were randomized and treated with either vehicle or VCR alone in a dose of 1 mg/kg/d or PLK1 inhibitor BI6727 in a dose of 5 mg/kg or in combination. d) Body weight of mice during intraperitoneal and/or intravenous VCR and/or PLK1 inhibitor BI6727 treatments. Dots represent means and whiskers SEM,  $n=6$  animals per condition. e) Quantification of IRS of PRC1 and positivity of  $\gamma$ -H2AX, cleaved caspase-3 (CC3) and Ki-67 per HPF of xenografts related to Fig. 4h. Data are displayed as individual dots. Horizontal bars represent median IRS of PRC1 or means and whiskers SEM for positivity, respectively;  $n=6$  animals per condition; two-sided Mann-Whitney test.

Supplementary Figure 6 Li et al.

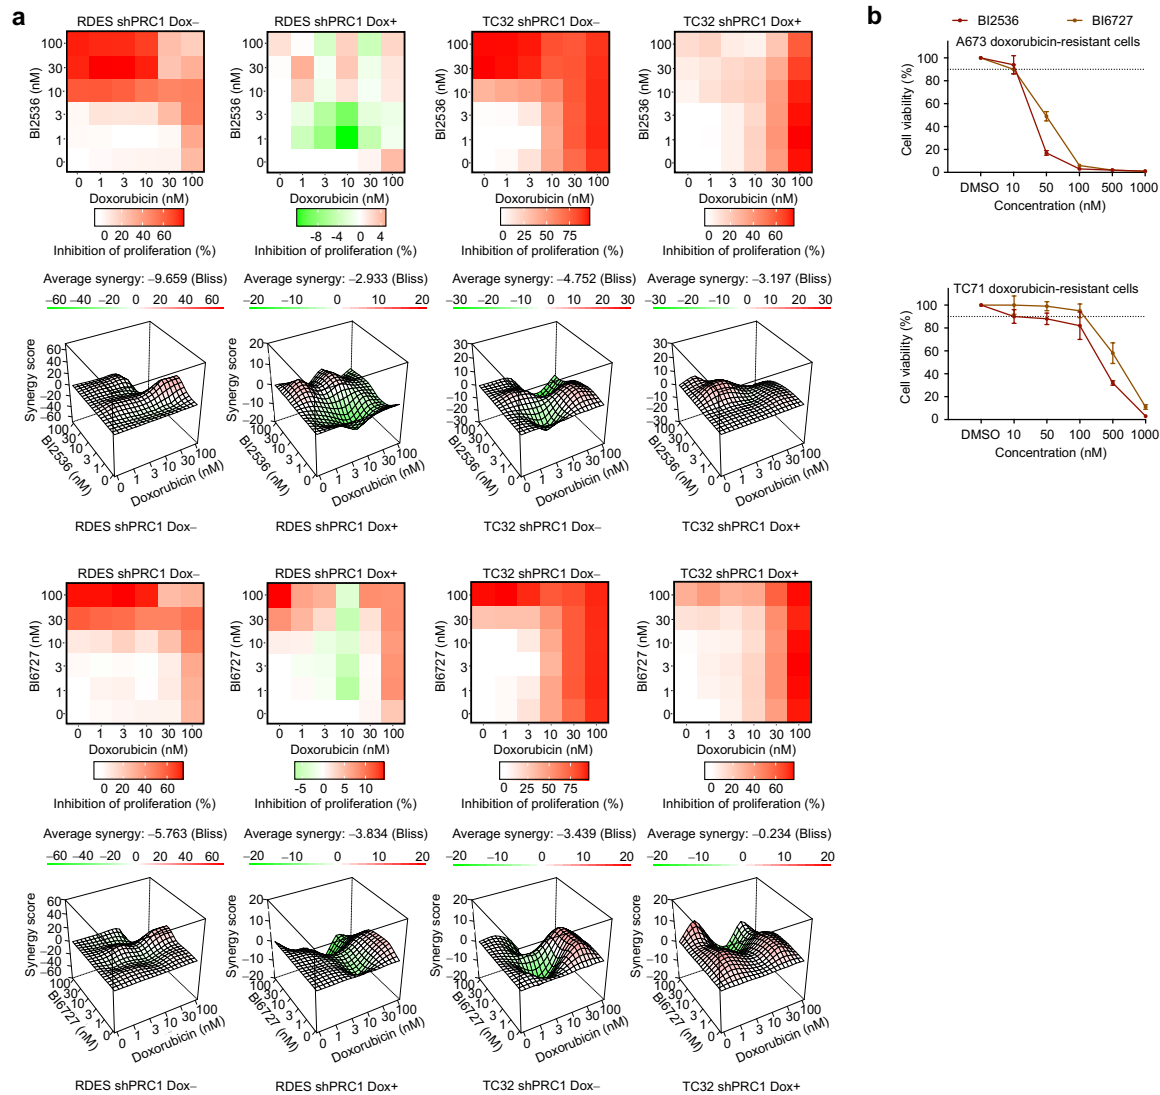

### Supplementary Fig. 6 | PLK1 inhibitor treatment in doxorubicin-resistant EwS cells

a) Excess over Bliss analysis of RDES and TC32 EwS cells with/without *PRC1* knockdown treated with combinations of doxorubicin and the PLK1 inhibitors BI2536 or BI6727 (red color indicates synergy) *in vitro*. Summary level data (means) from  $n=6$  biologically independent experiments are shown. b) Dose response of two doxorubicin-resistant (Doxo-res) EwS cell lines (A673, TC71) treated with the PLK1 inhibitors BI2536 or BI6727. Concentration of either PLK1 inhibitor below inhibitory concentrations of 90% viability ( $IC_{10}$ ) was defined as non-toxic (dashed lines). Dots represent means and whiskers SEM,  $n=6$  biologically independent experiments.



### Supplementary Figure 7 Li et al.

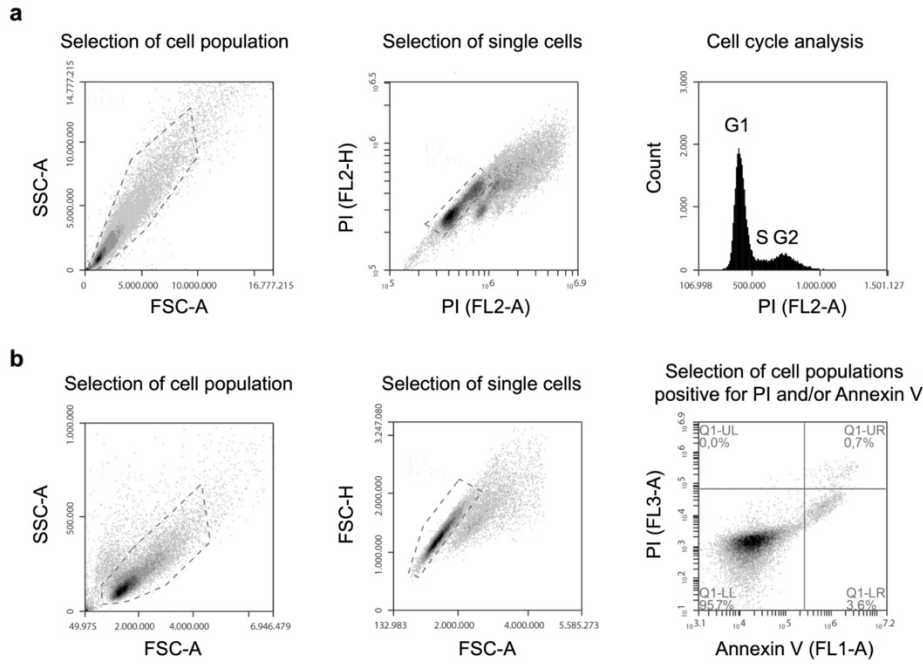

### Supplementary Fig. 7 | Examples of flow-cytometric gating strategies

a) Gating strategy for flow-cytometric cell-cycle analysis of EwS cells using PI. b) Gating strategy for Annexin V/PI staining of EwS cells.
